# Supplementary material for: Selective Recovery of Europium and Yttrium Ions with Cyanex 272-Polyacrylonitrile Nanofibers
Source: MDPI journal article supplement (doi:10.3390/nano9121648), 2019-11-20
Supplement: s1 [file s1]

## Supplementary Materials

# Selective Recovery of Europium and Yttrium Ions with Cyanex 272-Polyacrylonitrile Nanofibers

Diego Morillo Martín <sup>1</sup>, Leslie Diaz Jalaff <sup>2,3</sup>, Maria A. García <sup>2,3</sup>, and Mirko Faccini <sup>1,2,\*</sup>

<sup>1</sup> Applied Chemistry & Materials, LEITAT Technological Center, C/Pallars, 179-185, 08005 Barcelona, Spain, dmorillo@leitat.org

<sup>2</sup> R&D Department, Leitat Chile, Román Díaz 532, Providencia, Santiago 7500724, Chile; ldiaz@leitat.cl (L.D.J.); magarcia@leitat.cl (M.A.G.)

<sup>3</sup> Centro de Excelencia en Nanotecnología (CEN) Chile, Román Díaz 532, Providencia, Santiago 7500724, Chile

\* Correspondence: mfaccini@leitat.org; Tel.: +34-93-788-2300; Fax: +34-93-789-1906

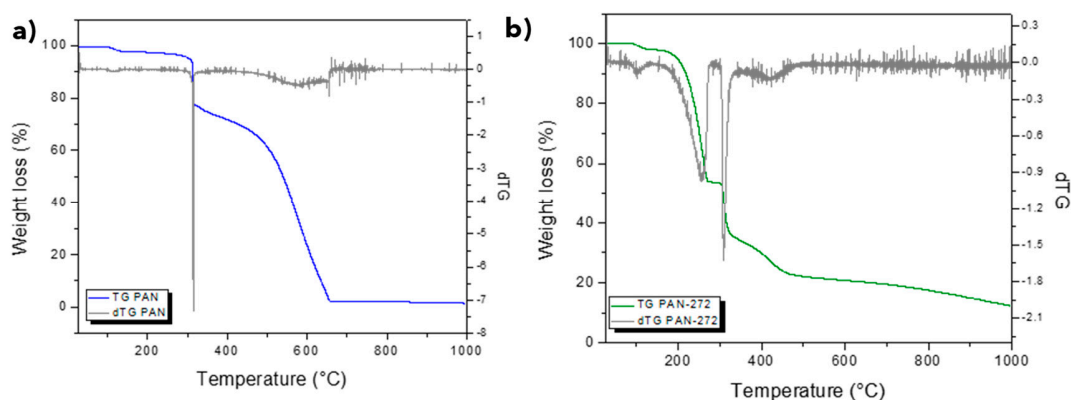

**Figure S1.** Thermograms and the first derivate of PAN and PAN-272

**Table S1.** Weight loss of PAN and PAN- 272 nanofibers membranes

| Temperature range (°C) | PAN-272(%) | PAN (%) |
|------------------------|------------|---------|
| <150                   | 2.08       | 1.7     |
| 145-284                | 44.3       | ---     |
| 280-350                | 20.2       | 20.7    |
| 350-450                | 10.9       | 75.9    |
| >450                   | 10.0       |         |

### Kinetic fitting

The kinetic model of pseudo-first order has been widely used to predict adsorption kinetics. The model given by Lagergren is defined as:

$$q_t = q_e (1 - e^{-k_1 t}) \quad (S1)$$

Integrating equation (S1) with respect to the boundary conditions  $q_t = 0$  to  $t = 0$  and  $q_t = q_e$  to  $t = t$ :

$$\log(q_e - q_t) = \log q_e - \frac{k_1}{2.303} t \quad (S2)$$

where  $k_1$  is the pseudo first order constant ( $\text{min}^{-1}$ );  $q_t$  and  $q_e$  are the adsorption capacities of the ion-selective nanofibers at time  $t$  and at equilibrium respectively and  $t$  (min) is the contact time.

The pseudo second order equation based on equilibrium adsorption is expressed as:

$$q_t = \frac{q_e^2 k_2 t}{1 + q_e k_2 t} \quad (S3)$$

Integrating equation (3) with respect to the boundary conditions  $q_t = 0$  to  $t = 0$  and  $q_t = q_e$  to  $t = t$ :

$$\frac{t}{q_t} = \frac{1}{q_e^2 k_2} + \frac{t}{q_e} \quad (S4)$$

Where  $k_2$  is the pseudo second order constant ( $\text{g mg}^{-1} \text{min}^{-1}$ );  $q_t$  and  $q_e$  are the adsorption capacities of the ion-selective nanofibers at time  $t$  and at equilibrium respectively and  $t$  (min) is the contact time.

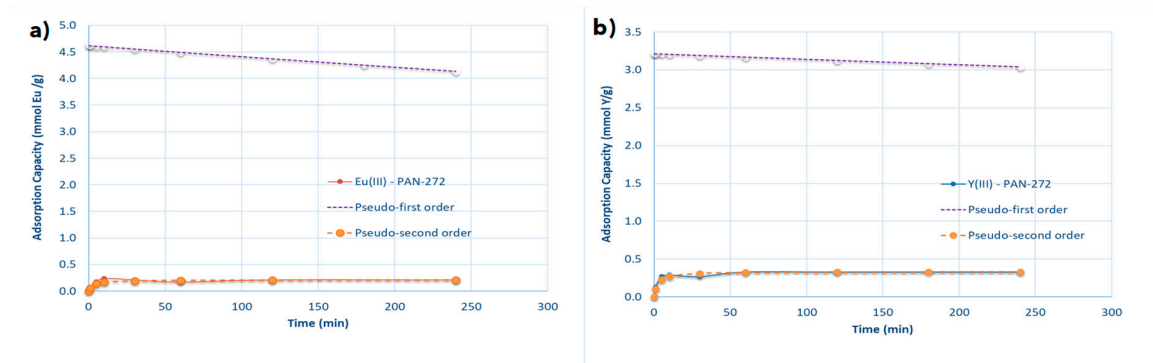

**Figure S2.** Fitting experimental data for first and second order kinetic models for Y(III) and Eu(III)

### Langmuir and Freundlich Isotherm models

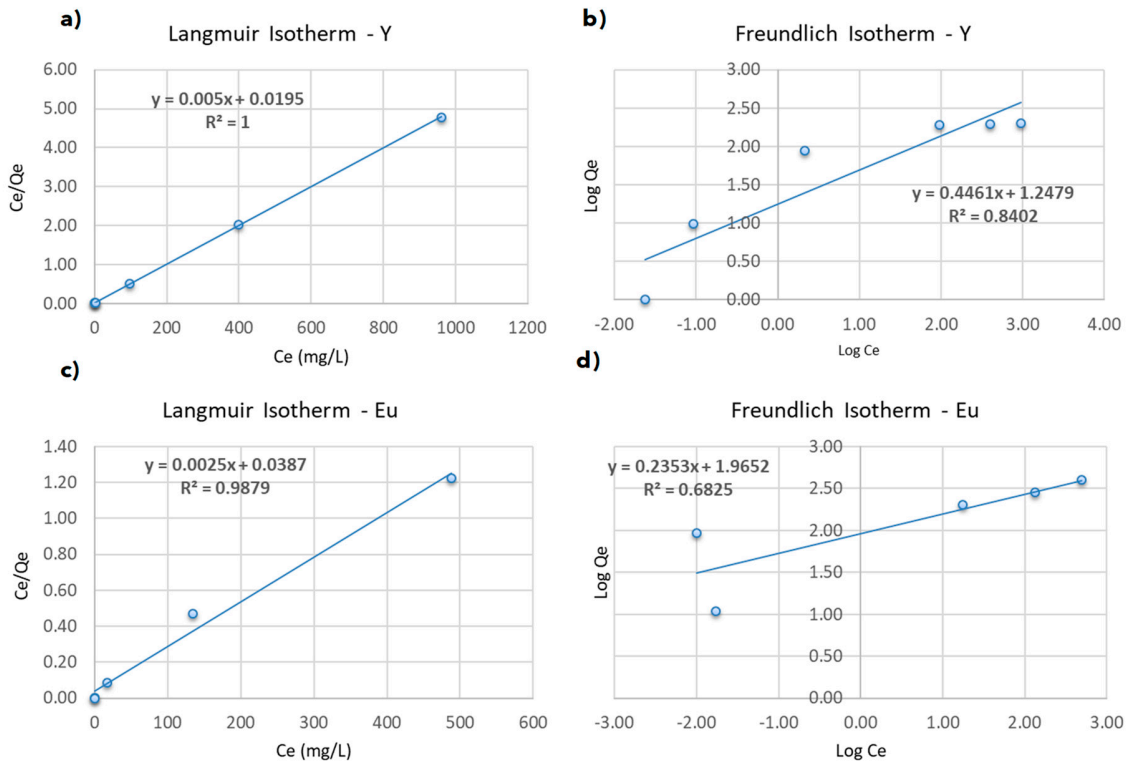

Figure S3. Fitting experimental data for Langmuir and Freundlich models for Eu(III) and Y(III)

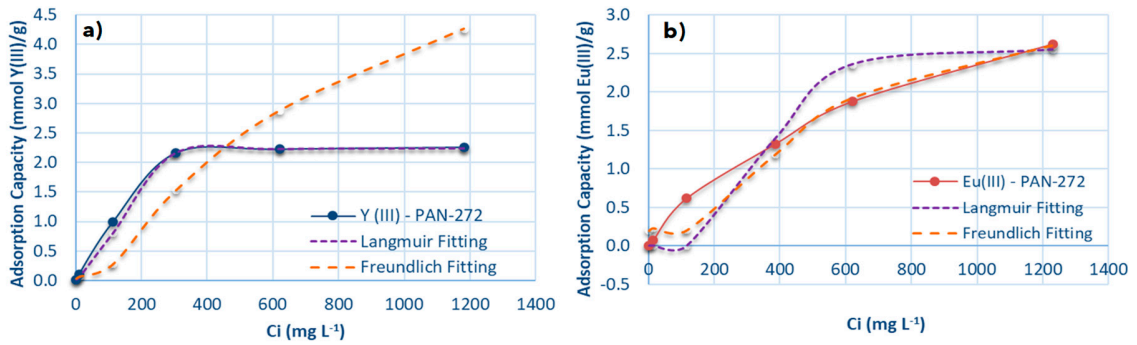

Figure S4. Langmuir and Freundlich models fitted graphs for Y(III) and Eu(III)
